# Supplementary material for: Composite membranes based on polyvinyl alcohol and lamellar solids for water decontamination
Source: Royal Society of Chemistry journal article supplement (doi:10.1039/d3nj04942f), 2023-12-21
Supplement: d3nj04942f1.pdf [file d3nj04942f1.pdf]

Supplementary information

## Composite membranes based on polyvinyl alcohol and lamellar solids for water decontamination

Maria Bastianini<sup>a\*</sup>, Michele Sisani<sup>a</sup>, Eziz Naryyev<sup>a,b</sup>, Annarita Petracci<sup>a</sup>, Irene Di Guida<sup>a</sup> and Riccardo Narducci<sup>b\*</sup>

<sup>a</sup> Prolabin & Tefarm s.r.l., Via dell'Acciaio 9, 06134 Perugia, Italy

<sup>b</sup> Dep. Industrial Engineering and International Laboratory "Ionomer Materials for Energy", University of Rome "Tor Vergata", via del Politecnico 1, 00133 Roma, Italy

### 2. Results and discussion

#### Synthesis and Characterization of the pristine powders

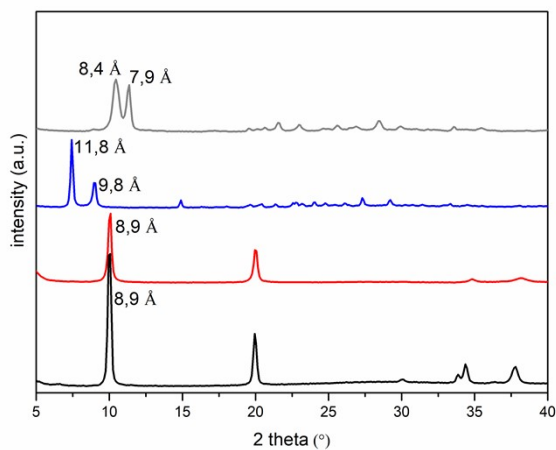

Figure S1. Black line corresponds to the spectrum of ZnAlNO<sub>3</sub> (dry sample), red line corresponds to the spectrum of MgAlNO<sub>3</sub> (dry sample), blue line corresponds to the spectrum of ZrP-Na (wet sample), grey line corresponds to the spectrum of ZrP-Na (dry sample).

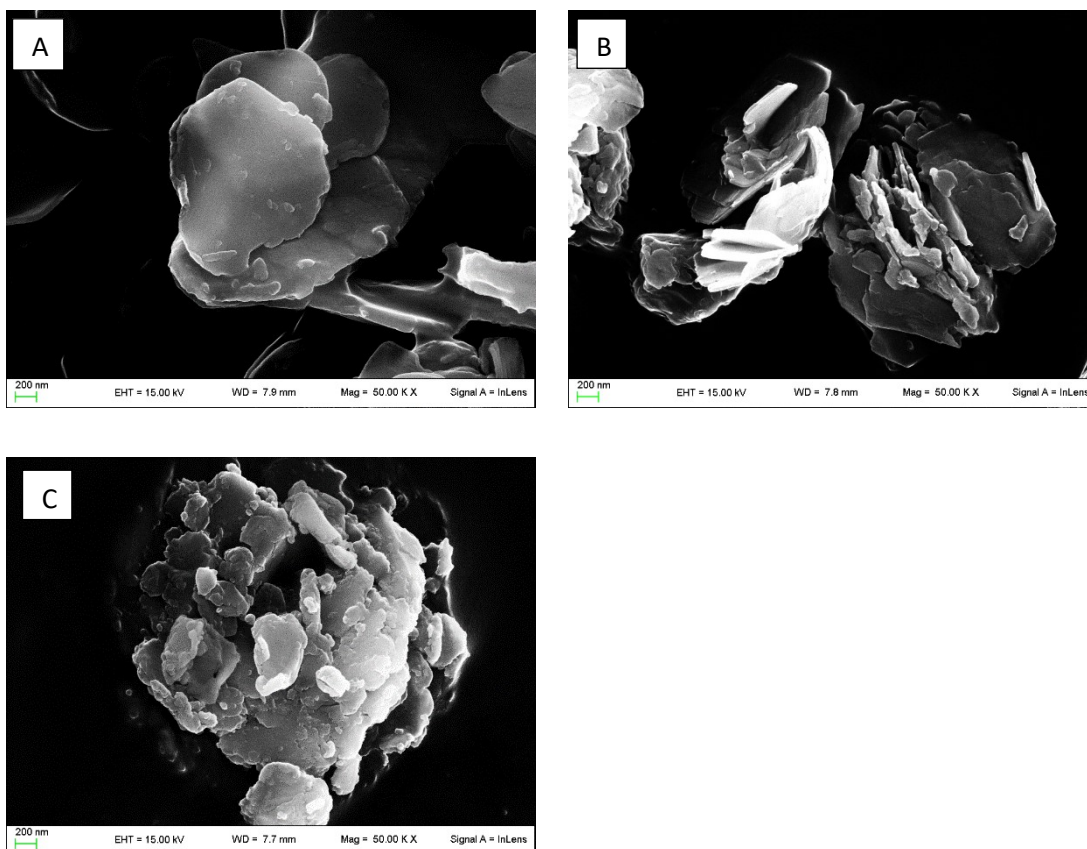

Figure S2. SEM micrographs of: ZrP-Na (A), MgAlNO<sub>3</sub> (B) and ZnAlNO<sub>3</sub> (C)

**Adsorption of heavy metals by ZrP-Na**

Table S1. Properties of heavy metal ions <sup>1,2</sup>.

| Metal ion        | $\Delta_{\text{hyd}}G_{\text{calc}}$ (kJ/mol) | First Hydrolysis constant (pK <sub>1</sub> ) |
|------------------|-----------------------------------------------|----------------------------------------------|
| Pb <sup>2+</sup> | -1345                                         | 7.71                                         |
| Ni <sup>2+</sup> | -2005                                         | 9.86                                         |
| Cr <sup>3+</sup> | -4965                                         | 8.30                                         |

Figure S3 shows XRPD spectra of the ZrP-Na after contact with heavy metals in different IEC ratios.

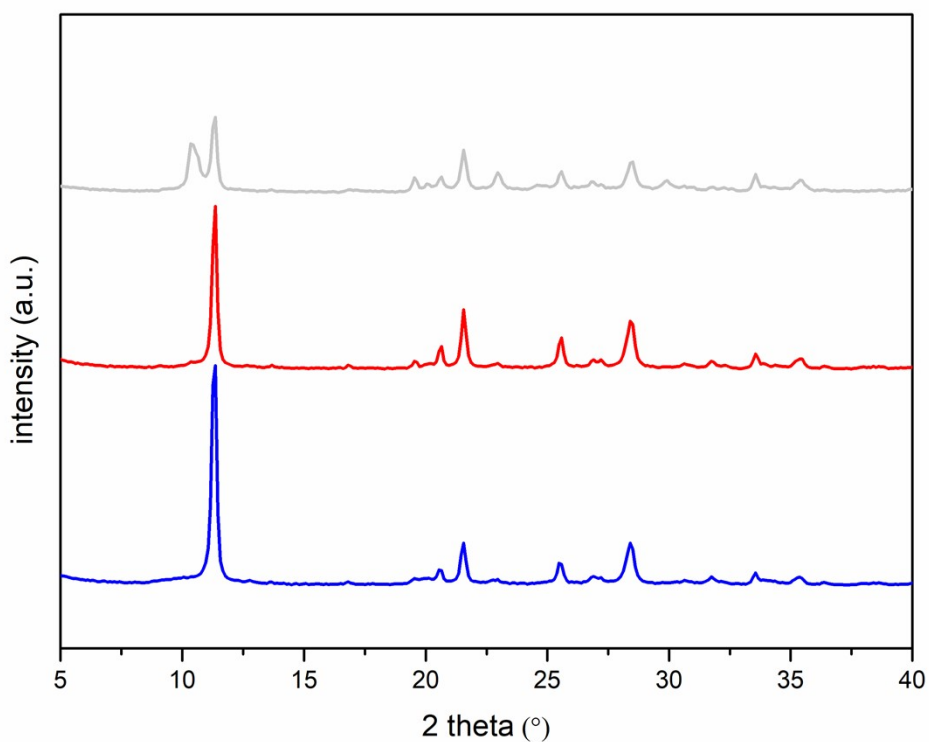

Figure S3. XRPD patterns of ZrP-Na after contact with heavy metals in different IEC ratios: blue line corresponds to the ZrP-Na 1:1 IEC, red line corresponds to the ZrP-Na 1:2 IEC, grey line corresponds to the ZrP-Na 1:10 IEC

**Adsorption of DS by MgAlNO<sub>3</sub>**

XRPD are shown in Figure S4.

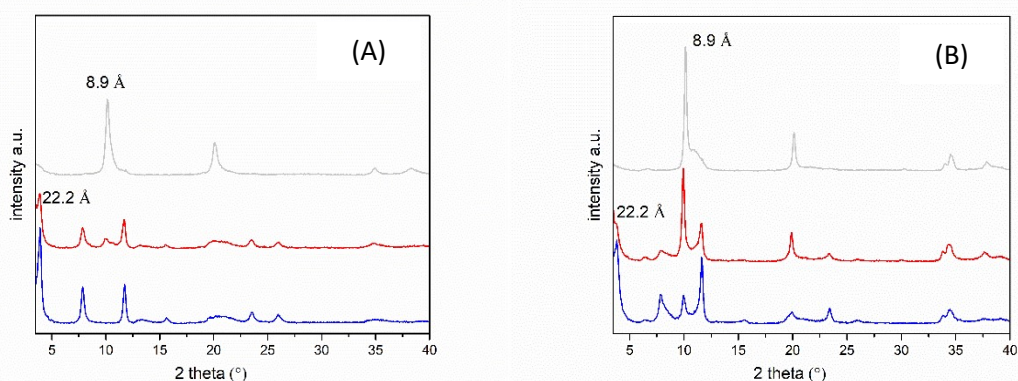

Figure S4. XRPD patterns of MgAlNO<sub>3</sub> (A) and ZnAlNO<sub>3</sub> (B) – after contact with DS in different IEC ratios: blue line corresponds to samples 1:1 IEC, red line corresponds to the samples 1:2 IEC, grey line corresponds to the samples 1:20 IEC

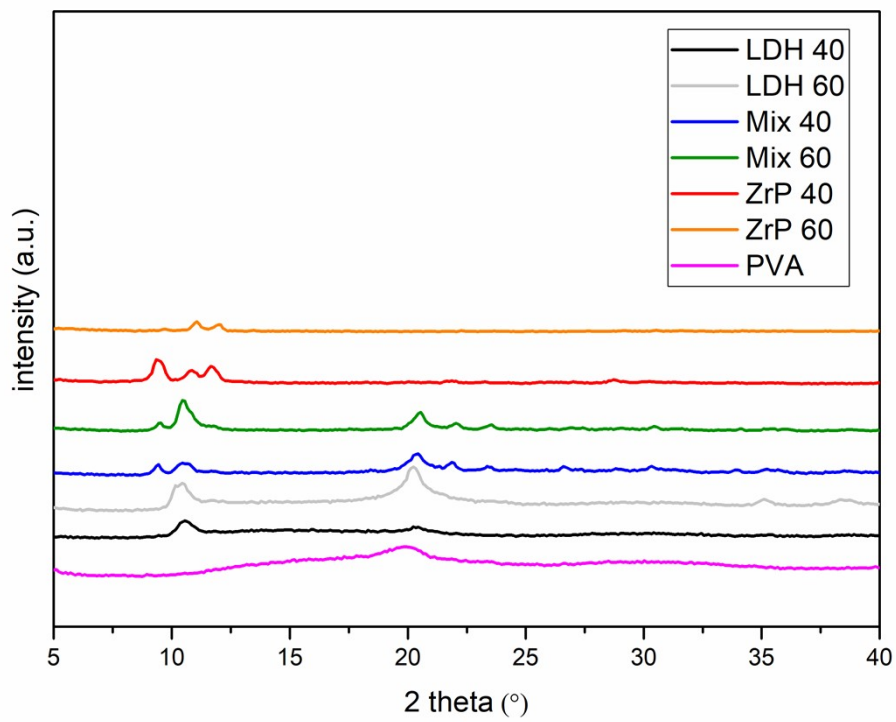

Figure S5. XRD patterns of composite membranes

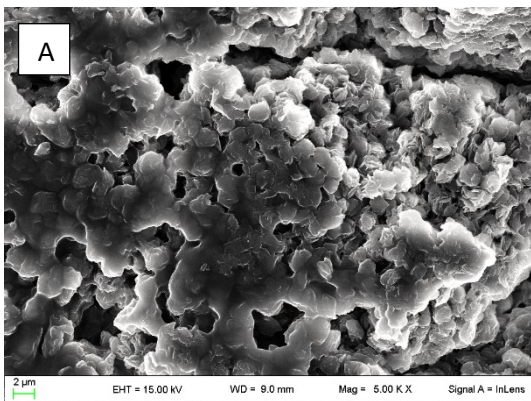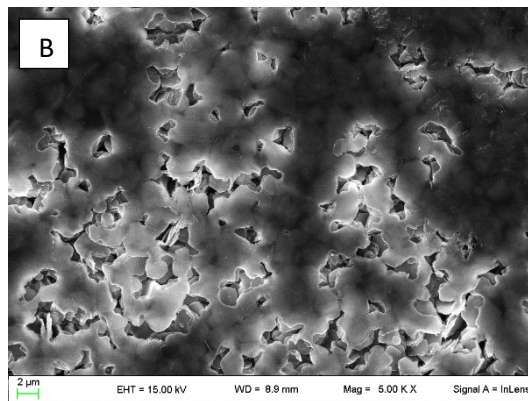

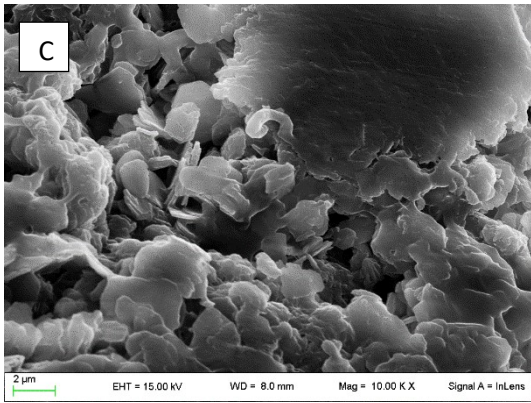

Figure S6. SEM micrographs of composite membranes: PVA/40MgAlNO<sub>3</sub> (A), PVA/40ZrP-Na (B) and PVA/20 MgAlNO<sub>3</sub>/20ZrP-Na (C)

Table S2. Water uptake percentages and material loss during the swelling test for the membrane films

| Membrane films                      | WU (%) | Mass loss (%) |
|-------------------------------------|--------|---------------|
| PVA                                 | 78     | 1.84          |
| PVA/40MgAlNO <sub>3</sub>           | 143    | 7.10          |
| PVA/40ZrP-Na                        | 90     | 1.15          |
| PVA/20MgAlNO <sub>3</sub> /20ZrP-Na | 102    | 3.51          |

The EDX mapping analysis of PVA/20MgAlNO<sub>3</sub>/20ZrP-Na membrane after contact with solution containing mixture of heavy metals is shown in Figure S7.

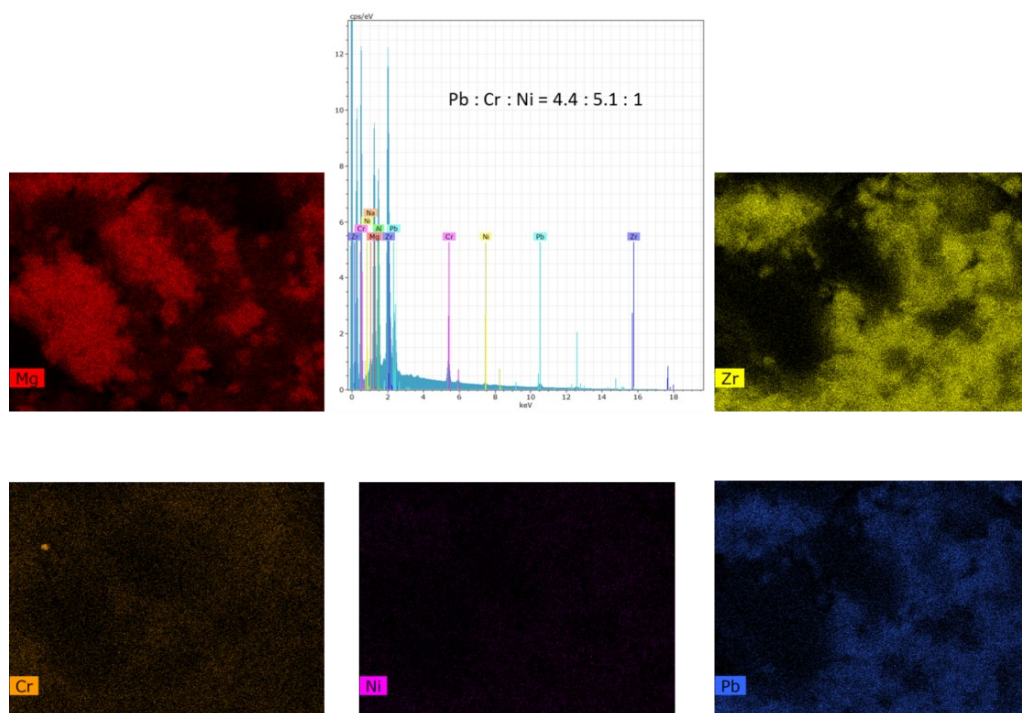

Figure S7. SEM-EDX mapping of Mg, Zr, Cr, Ni, Pb on PVA/20MgAlNO<sub>3</sub>/20ZrP-Na membrane after contact with metal ions

#### 4. Experimental section

Table S3. Amounts of materials used for the preparation of membranes

| Label                               | Weight (mg) |                     |        |    | Volume (mL) |
|-------------------------------------|-------------|---------------------|--------|----|-------------|
|                                     | PVA         | MgAlNO <sub>3</sub> | ZrP-Na | GA | DI water    |
| PVA/40MgAlNO <sub>3</sub>           | 360         | 240                 | -      | 18 | 15          |
| PVA/60MgAlNO <sub>3</sub>           | 240         | 360                 | -      | 12 | 15          |
| PVA/40ZrP-Na                        | 360         | -                   | 240    | 18 | 15          |
| PVA/60ZrP-Na                        | 240         | -                   | 360    | 12 | 15          |
| PVA/20MgAlNO <sub>3</sub> /20ZrP-Na | 360         | 120                 | 120    | 18 | 15          |
| PVA/30MgAlNO <sub>3</sub> /30ZrP-Na | 240         | 180                 | 180    | 12 | 15          |

Table S4. Amounts of powders used in the decontamination tests of DS.

| Label                     | Powder              | Weight (g) | IEC considered (mmol/g) | Ratio |
|---------------------------|---------------------|------------|-------------------------|-------|
| MgAlNO <sub>3</sub> (x1)  | MgAlNO <sub>3</sub> | 0.233      | 3.38                    | 1:1   |
| MgAlNO <sub>3</sub> (x2)  |                     | 1.165      |                         | 1:2   |
| MgAlNO <sub>3</sub> (x5)  |                     | 2.330      |                         | 1:5   |
| MgAlNO <sub>3</sub> (x10) |                     | 4.660      |                         | 1:10  |
| ZnAlNO <sub>3</sub> (x1)  | ZnAlNO <sub>3</sub> | 0.302      | 2.60                    | 1:1   |
| ZnAlNO <sub>3</sub> (x2)  |                     | 0.604      |                         | 1:2   |
| ZnAlNO <sub>3</sub> (x5)  |                     | 1.208      |                         | 1:5   |
| ZnAlNO <sub>3</sub> (x10) |                     | 2.416      |                         | 1:10  |

Table S5. Amounts of powders used in the decontamination tests of heavy metals.

| Heavy metal      | Powder | Weight (g) | IEC considered (mmol Na <sup>+</sup> /g) | Ratio |
|------------------|--------|------------|------------------------------------------|-------|
| Pb <sup>2+</sup> | ZrP-Na | 0.055      | 4.49                                     | 1:1   |
|                  |        | 0.110      |                                          | 1:2   |
|                  |        | 0.275      | 4.49                                     | 1:5   |
|                  |        | 0.550      |                                          | 1:10  |
| Ni <sup>2+</sup> | ZrP-Na | 0.190      | 4.49                                     | 1:1   |
|                  |        | 0.380      |                                          | 1:2   |
|                  |        | 0.950      |                                          | 1:5   |
|                  |        | 1.900      |                                          | 1:10  |
| Cr <sup>3+</sup> | ZrP-Na | 0.322      | 4.49                                     | 1:1   |



|                                                        |        |       |      |      |
|--------------------------------------------------------|--------|-------|------|------|
|                                                        |        | 0.644 |      | 1:2  |
|                                                        |        | 1.610 |      | 1:5  |
|                                                        |        | 3.220 |      | 1:10 |
| Pb <sup>2+</sup> , Ni <sup>2+</sup> , Cr <sup>3+</sup> | ZrP-Na | 0.227 | 4.49 | 1:1  |
|                                                        |        | 0.454 |      | 1:2  |
|                                                        |        | 1.135 |      | 1:5  |
|                                                        |        | 2.270 |      | 1:10 |

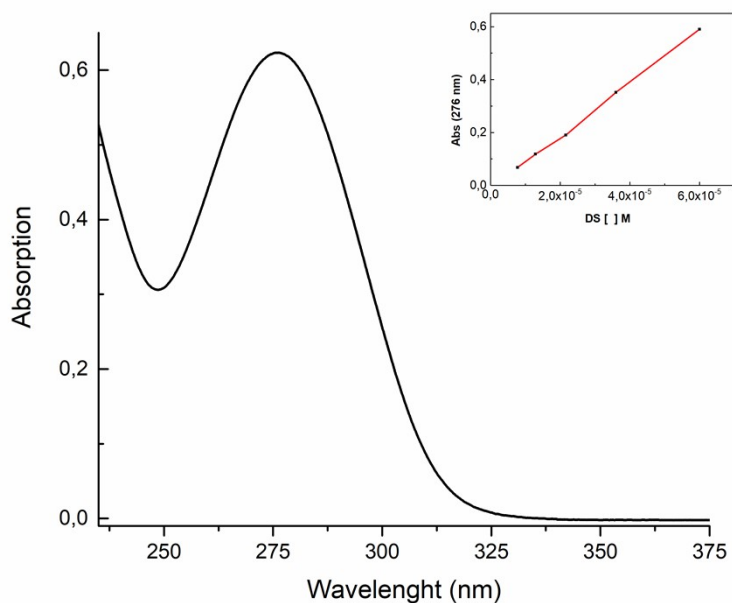

Figure S8: The DS absorption spectrum at 276 nm and the obtained regression curve

1. Marcus, Y. Thermodynamics of Solvation of Ions. *J. Chem. Soc., Faraday Trans.* **1993**, *89*, 713–718.
2. Barnum, D.W. Hydrolysis of Cations. Formation Constants and Standard Free Energies of Formation of Hydroxy Complexes. *Inorg. Chem.* **1983**, *22*, 2297–2305, doi:10.1021/ic00158a016.
